# Supplementary material
Source: PubMed Central journal article supplement (PMC7162318)
Supplement: CMDC-9-1522-s001.pdf [file CMDC-9-1522-s001.pdf]

## Supporting Information

© Copyright Wiley-VCH Verlag GmbH & Co. KGaA, 69451 Weinheim, 2014

### **Anti-Dengue-Virus Activity and Structure–Activity Relationship Studies of Lycorine Derivatives**

Peng Wang,<sup>[c, d]</sup> Lin-Feng Li,<sup>[a, d]</sup> Qing-Yin Wang,<sup>[b]</sup> Lu-Qing Shang,<sup>\*, [a, d]</sup> Pei-Yong Shi,<sup>\*, [b]</sup> and Zheng Yin<sup>\*, [a, d]</sup>

cmdc\_201300505\_sm\_miscellaneous\_information.pdf

**Table S1.** The lycorine derivatives containing a modified A-ring, and their in vitro activities against DENV.

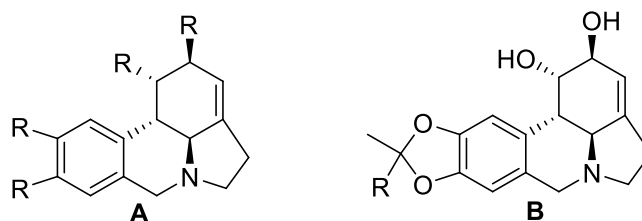

| Compound | Structure | R                                                  | CC <sub>50</sub> <sup>a</sup> /μM | EC <sub>50</sub> <sup>b</sup> /μM |
|----------|-----------|----------------------------------------------------|-----------------------------------|-----------------------------------|
| <b>3</b> | A         | OAc                                                | >300                              | >300                              |
| <b>4</b> | A         | OH                                                 | >300                              | >300                              |
| <b>5</b> | B         | CH <sub>3</sub>                                    | >300                              | >300                              |
| <b>6</b> | B         | (CH <sub>2</sub> ) <sub>2</sub> CH <sub>3</sub>    | >300                              | >300                              |
| <b>7</b> | B         | (CH <sub>2</sub> ) <sub>2</sub> CH <sub>2</sub> Cl | >300                              | >300                              |
| <b>8</b> | B         |                                                    | >300                              | >300                              |
| <b>9</b> | B         |                                                    | >300                              | >300                              |

<sup>a</sup>The molar concentration of a drug that causes 50% reduction in cell viability.

<sup>b</sup>The molar concentration of a drug that inhibits 50% of viral antigen production.

**Table S2.** Predicted pEC<sub>50</sub> calculated by 3D-QSAR.

| Compound  | pEC <sub>50</sub> <sup>a</sup> | Pred. pEC <sub>50</sub> <sup>b</sup> | Compound  | pEC <sub>50</sub> <sup>a</sup> | Pred. pEC <sub>50</sub> <sup>b</sup> |
|-----------|--------------------------------|--------------------------------------|-----------|--------------------------------|--------------------------------------|
| <b>1</b>  | 6.1                            | 6.1                                  | <b>27</b> | 4.5                            | 4.5                                  |
| <b>2</b>  | 4.6                            | 4.6                                  | <b>28</b> | 3.6                            | 3.6                                  |
| <b>10</b> | 6.4                            | 6.4                                  | <b>29</b> | 3.9                            | 3.9                                  |
| <b>11</b> | 4.5                            | 4.5                                  | <b>30</b> | 4.0                            | 4.0                                  |
| <b>12</b> | 3.9                            | 3.9                                  | <b>31</b> | 4.7                            | 4.7                                  |
| <b>13</b> | 3.8                            | 3.8                                  | <b>32</b> | 4.5                            | 4.5                                  |
| <b>14</b> | 4.7                            | 4.7                                  | <b>33</b> | 4.4                            | 4.4                                  |
| <b>15</b> | 4.3                            | 4.4                                  | <b>34</b> | 5.1                            | 5.2                                  |
| <b>16</b> | 4.1                            | 4.5                                  | <b>35</b> | 5.1                            | 5.0                                  |
| <b>17</b> | 3.8                            | 3.8                                  | <b>36</b> | 5.4                            | 5.4                                  |
| <b>18</b> | 4.0                            | 4.0                                  | <b>37</b> | 5.3                            | 5.3                                  |
| <b>19</b> | 4.0                            | 4.0                                  | <b>38</b> | 4.5                            | 4.5                                  |
| <b>22</b> | 5.7                            | 5.7                                  | <b>39</b> | 4.4                            | 4.4                                  |
| <b>23</b> | 6.3                            | 6.3                                  | <b>40</b> | 4.2                            | 4.2                                  |
| <b>25</b> | 3.7                            | 3.6                                  | <b>41</b> | 3.9                            | 3.9                                  |
| <b>26</b> | 3.7                            | 3.7                                  |           |                                |                                      |

<sup>d</sup>Negative logarithm of EC<sub>50</sub>.

<sup>e</sup>Predicted pEC<sub>50</sub> is calculated using the 3D-QSAR model for validation.

### General procedure for 6-7

To a solution of **4** in 2 mL of methanol, anhydrous ketone (20 eq) and PTSA (0.2 eq) were added, and the mixture was refluxed at 70 °C for 20 h. The solvent was removed under reduced pressure followed by the addition of DCM and water. The organic layer was dried over anhydrous Na<sub>2</sub>SO<sub>4</sub> and filtered. The filtrate was concentrated, and the crude residue was purified using silica gel chromatography to yield the product.

### 12-Methyl-12-propyllycorine (**6**)

Following the previously described general procedure, 129 mg (0.47 mmol) of **4** yielded **6** as a pale solid (146 mg, 90.6%). <sup>1</sup>H NMR (400 MHz, CD<sub>3</sub>OD): δ=0.84 (t, *J*= 6.8 Hz, 3H), 1.32 (m, 2H), 1.43 (s, 3H), 1.56 (m, 2H), 2.82 (m, 2H), 3.07 (d, *J*=11.2 Hz, 1H), 3.42 (m, 1H), 3.73 (m, 2H), 4.14 (d, *J*=13.6 Hz, 1H), 4.42 (d, *J*=13.6 Hz, 1H), 4.92 (s, 1H), 5.15 (d, *J*=5.2 Hz, 1H), 5.84 (s, 1H), 6.76 (s, 1H), 7.00 ppm (s, 1H); <sup>13</sup>C NMR (100 MHz, CD<sub>3</sub>OD): δ=14.6, 17.9, 24.0, 30.4, 42.7, 43.3, 54.5, 54.9, 62.0, 72.2, 75.0, 111.7, 113.4, 115.3, 122.2, 122.9, 129.9, 140.1, 145.8, 147.2 ppm; ESI-MS: *m/z* 344 [M+H]<sup>+</sup>; HRMS: [M+H]<sup>+</sup> calcd. for C<sub>20</sub>H<sub>25</sub>NO<sub>4</sub>: 344.1840, found: 344.1849.

### 12-Methyl-12-(3-chloro-propyl)lycorine (**7**)

Following the previously described general procedure, 182 mg (0.58 mmol) of **4** yielded **7** as a pale solid (56 mg, 46.2%). <sup>1</sup>H NMR (400 MHz, CD<sub>3</sub>OD): δ=1.34 (s, 3H), 1.77-1.64 (m, 4H), 2.63-2.53 (m, 1H), 2.66 (m, 2H), 2.73 (d, *J*=10.4 Hz, 1H), 3.01 (d, *J*=10.4 Hz, 1H), 3.28-3.19 (m, 1H), 3.44 (m, 2H), 3.49 (d, *J*=14.0 Hz, 1H), 3.76 (d, *J*=13.6 Hz, 1H), 4.66 (m, 1H), 4.83 (m, 1H), 5.59 (s, 1H), 6.16 (s, 1H), 6.65 ppm (s, 1H); <sup>13</sup>C NMR (400 MHz, CD<sub>3</sub>OD): δ=24.2, 26.8, 28.7, 36.8, 43.2, 45.4, 53.6, 55.7, 60.8, 72.0, 75.0, 109.8, 111.8, 113.7, 118.0, 125.6, 126.3, 143.7, 144.0, 144.2 ppm; ESI-MS: *m/z* 378 [M+H]<sup>+</sup>; HRMS: [M+H]<sup>+</sup> calcd. for C<sub>20</sub>H<sub>24</sub>ClNO<sub>4</sub>: 378.1467, found: 378.1469.

### General procedure for 11-13 and 16-19

To a solution of **10** in anhydrous pyridine, acyl chloride or anhydride in anhydrous DCM was slowly added for 15 min at 0 °C. The solution was stirred at 0 °C until TLC analysis indicated that all of the starting material had been consumed. Subsequently, DCM and water were added. The organic layer was washed using an aqueous NaHCO<sub>3</sub> solution and brine, dried over anhydrous Na<sub>2</sub>SO<sub>4</sub> and filtered. The filtrate was concentrated under reduced pressure, and the crude residue was purified using silica gel chromatography to yield the products.

### 1-Acetyl-2-valeryllycorine (**12**)

Following the previously described general procedure, 95 mg (0.28 mmol) of **10** yielded **12** as a pale solid (163 mg, 64.7%). <sup>1</sup>H NMR (400 MHz, CDCl<sub>3</sub>): δ=0.91 (t, *J*=7.3 Hz, 3H), 1.36 (dd, *J*=15.0, 7.4 Hz, 3H), 1.61 (dd, *J*=15.2, 7.6 Hz, 2H), 1.95 (s, 3H), 2.33 (td, *J*=7.4, 3.3 Hz, 2H), 2.43 (dd, *J*=17.5, 8.7 Hz, 1H), 2.66 (s, 2H), 2.81 (d, *J*=10.5 Hz, 1H), 2.89 (d, *J*=10.5 Hz, 1H), 3.38 (dt, *J*=9.1, 4.7 Hz, 1H), 3.55 (d, *J*=14.0 Hz, 1H), 4.16 (d, *J*=14.1 Hz, 1H), 5.26 (s, 1H), 5.53 (s, 1H), 5.73 (s, 1H), 5.92 (s, 2H), 6.57 (s, 1H), 6.75 ppm (s, 1H); <sup>13</sup>C NMR (100 MHz, CDCl<sub>3</sub>): δ=13.7, 20.9, 22.2, 26.9, 28.7, 34.1, 40.4, 53.6, 56.7, 61.2, 69.2, 70.6, 101.0, 105.1, 107.3, 114.0, 126.6, 129.3, 145.8, 146.3, 146.5, 170.0, 172.5 ppm; ESI-MS: *m/z* 414 [M+H]<sup>+</sup>; HRMS: *m/z* [M+H]<sup>+</sup> calcd. for C<sub>23</sub>H<sub>28</sub>NO<sub>6</sub>: 414.1917, found: 414.1905.

### 1-Acetyl-2-hexanoyllycorine (**13**)

Following the previously described general procedure, 95 mg (0.28 mmol) of **10** yielded **13** as a white solid (99 mg, 75.0%). <sup>1</sup>H NMR (400 MHz, CDCl<sub>3</sub>): δ=0.86 (m, 3H), 1.28 (m, 4H), 1.61 (m, 2H), 1.92 (s, 3H), 2.29 (m, 2H), 2.37 (m, 1H), 2.62 (m, 2H), 2.75 (d, *J*=10.4 Hz, 1H), 2.85 (d, *J*=10.0

Hz, 1H), 3.34 (m, 1H), 3.50 (d,  $J=14.0$  Hz, 1H), 4.13 (d,  $J=14.0$  Hz, 1H), 5.23 (s, 1H), 5.49 (s, 1H), 5.70 (s, 1H), 5.88 (s, 2H), 6.54 (s, 1H), 6.71 ppm (s, 1H);  $^{13}\text{C}$  NMR (100 MHz,  $\text{CDCl}_3$ ):  $\delta=14.0, 21.0, 22.3, 24.6, 28.7, 31.2, 34.3, 40.5, 53.6, 56.9, 61.2, 69.2, 70.6, 101.0, 105.0, 107.3, 114.0, 126.5, 129.4, 145.9, 146.3, 146.4, 170.0, 172.5$  ppm; ESI-MS:  $m/z$  428  $[\text{M}+\text{H}]^+$ ; HRMS:  $m/z$   $[\text{M}+\text{H}]^+$  calcd. for  $\text{C}_{24}\text{H}_{30}\text{NO}_6$ : 428.2073, found: 428.2067.

#### **1-Acetyl-2-pivaloyllycorine (16)**

Following the previously described general procedure, 95 mg (0.28 mmol) of **10** yielded **16** as a pale solid (34 mg, 13.5%).  $^1\text{H}$  NMR (400 MHz,  $\text{CDCl}_3$ ):  $\delta=1.22$  (s, 9H), 1.97 (s, 3H), 2.44 (m, 1H), 2.68 (s, 2H), 2.81 (d,  $J=10.6$  Hz, 1H), 2.90 (d,  $J=10.4$  Hz, 1H), 3.41 (dt,  $J=9.0, 4.7$  Hz, 1H), 3.56 (d,  $J=14.1$  Hz, 1H), 4.19 (d,  $J=14.2$  Hz, 1H), 5.24 (s, 1H), 5.52 (s, 1H), 5.72 (s, 1H), 5.93 (s, 2H), 6.59 (s, 1H), 6.77 ppm (s, 1H);  $^{13}\text{C}$  NMR (100 MHz,  $\text{CDCl}_3$ ):  $\delta=20.9, 27.1, 28.6, 38.7, 40.6, 53.6, 56.8, 61.3, 69.1, 70.6, 101.0, 105.1, 107.3, 113.9, 126.6, 129.3, 145.8, 146.3, 146.5, 169.9, 177.2$  ppm; ESI-MS:  $m/z$  414  $[\text{M}+\text{H}]^+$ ; HRMS:  $m/z$   $[\text{M}+\text{H}]^+$  calcd. for  $\text{C}_{23}\text{H}_{28}\text{NO}_6$ : 414.1917, found: 414.1912.

#### **1-Acetyl-2-(4-nitrobenzoyl)lycorine (18)**

Following the previously described general procedure, 120 mg (0.36 mmol) of **10** yielded **18** as a pale yellow solid (121 mg, 69.5%).  $^1\text{H}$  NMR (400 MHz,  $\text{CDCl}_3$ ):  $\delta=1.95$  (s, 3H), 2.40 (m, 1H), 2.65 (m, 2H), 2.82 (d,  $J=10.0$  Hz, 1H), 2.98 (d,  $J=10.4$  Hz, 1H), 3.36 (m, 1H), 3.52 (d,  $J=14.0$  Hz, 1H), 4.14 (d,  $J=14.4$  Hz, 1H), 5.53 (s, 1H), 5.59 (s, 1H), 5.85 (s, 3H), 6.53 (s, 1H), 6.71 (s, 1H), 8.18 ppm (m, 4H);  $^{13}\text{C}$  NMR (100 MHz,  $\text{CDCl}_3$ ):  $\delta=28.8, 40.4, 45.1, 53.5, 56.6, 61.1, 68.9, 72.0, 72.0, 101.1, 104.9, 107.4, 113.3, 123.5, 126.2, 129.1, 130.9, 135.3, 146.5, 146.6, 147.0, 150.6, 163.4, 170.0$  ppm; ESI-MS:  $m/z$  479  $[\text{M}+\text{H}]^+$ ; HRMS:  $m/z$   $[\text{M}+\text{H}]^+$  calcd. for  $\text{C}_{25}\text{H}_{23}\text{N}_2\text{O}_8$ : 479.1449, found: 479.1446.

#### **1-Acetyl-2-(4-chlorobenzoyl)lycorine (19)**

Following the previously described general procedure, 200 mg (0.61 mmol) of **10** yielded **19** as a pale yellow solid (180 mg, 72.1%).  $^1\text{H}$  NMR (400 MHz,  $\text{CDCl}_3$ ):  $\delta=2.01$  (s, 3H), 2.48 (q,  $J=8.8$  Hz, 1H), 2.71 (d,  $J=1.8$  Hz, 2H), 2.89 (d,  $J=10.4$  Hz, 1H), 3.05 (d,  $J=10.4$  Hz, 1H), 3.48-3.38 (m, 1H), 3.60 (d,  $J=14.0$  Hz, 1H), 4.22 (d,  $J=14.1$  Hz, 1H), 5.55 (d,  $J=1.5$  Hz, 1H), 5.65 (s, 1H), 5.90 (s, 1H), 5.94 (d,  $J=1.1$  Hz, 2H), 6.62 (s, 1H), 6.80 (s, 1H), 7.42 (d,  $J=8.6$  Hz, 2H), 7.99 ppm (d,  $J=8.6$  Hz, 2H);  $^{13}\text{C}$  NMR (100 MHz,  $\text{CDCl}_3$ ):  $\delta=21.0, 28.7, 40.6, 53.6, 56.8, 61.3, 69.0, 71.3, 101.0, 105.1, 107.4, 113.7, 126.4, 128.3, 128.7, 129.3, 131.2, 139.6, 146.6, 164.4, 170.0$  ppm; ESI-MS:  $m/z$  468  $[\text{M}+\text{H}]^+$ ; HRMS:  $m/z$   $[\text{M}+\text{H}]^+$  calcd. for  $\text{C}_{25}\text{H}_{23}\text{ClNO}_6$ : 468.1208, found: 468.1200.

#### **General procedure for 34-41**

To a solution of **23** in 5 mL of anhydrous pyridine, chloride was added, and the solution was stirred at 0 °C until TLC analysis indicated that all of the starting material had been consumed followed by the addition of DCM and water. The organic layer was washed with an aqueous  $\text{NaHCO}_3$  solution and brine, dried over anhydrous  $\text{Na}_2\text{SO}_4$  and filtered. The filtrate was concentrated under reduced pressure, and the crude residue was purified using silica gel chromatography to yield the products.

#### **1-Butyryl-2-oxolycorine (35)**

Following the previously described general procedure, 200 mg (0.70 mmol) of **23** yielded **35** as a white solid (112 mg, 45.0%).  $^1\text{H}$  NMR (400 MHz,  $\text{CDCl}_3$ ):  $\delta=0.78$  (t,  $J=7.4$  Hz, 3H), 1.51 (dd,  $J=14.7, 7.3$  Hz, 2H), 2.18 (td,  $J=7.3, 4.0$  Hz, 2H), 2.54 (d,  $J=8.6$  Hz, 1H), 2.87 (s, 2H), 3.18 (d,  $J=9.7$  Hz, 1H), 3.28 (d,  $J=9.9$  Hz, 1H), 3.47 (dd,  $J=8.8, 4.4$  Hz, 1H), 3.61 (d,  $J=14.1$  Hz, 1H), 4.18

(d,  $J=14.1$  Hz, 1H), 5.92 (s, 2H), 6.05–5.97 (m, 2H), 6.58 (s, 1H), 6.73 ppm (s, 1H);  $^{13}\text{C}$  NMR (100 MHz,  $\text{CDCl}_3$ ):  $\delta=13.3, 18.4, 30.0, 35.9, 45.5, 53.2, 56.3, 62.4, 68.7, 101.1, 105.6, 107.3, 120.4, 125.3, 128.8, 146.6, 146.7, 169.0, 172.1, 193.1$  ppm; ESI-MS:  $m/z$  356  $[\text{M}+\text{H}]^+$ ; HRMS:  $m/z$   $[\text{M}+\text{H}]^+$  calcd. for  $\text{C}_{20}\text{H}_{22}\text{NO}_5$ : 356.1498, found: 356.1496.

#### 1-Valeryl-2-oxolycorine (36)

Following the previously described general procedure, 200 mg (0.70 mmol) of **23** yielded **36** as a white solid (164 mg, 72.0%).  $^1\text{H}$  NMR (400 MHz,  $\text{CDCl}_3$ ):  $\delta=0.76$  (t,  $J=7.3$  Hz, 3H), 1.13 (dd,  $J=12.0, 6.9$  Hz, 2H), 1.51–1.38 (m, 2H), 2.19 (dd,  $J=9.4, 4.6$  Hz, 2H), 2.53 (dd,  $J=17.2, 8.6$  Hz, 1H), 2.86 (s, 2H), 3.17 (d,  $J=9.8$  Hz, 1H), 3.27 (d,  $J=9.6$  Hz, 1H), 3.52–3.41 (m, 1H), 3.60 (d,  $J=14.1$  Hz, 1H), 4.17 (d,  $J=14.1$  Hz, 1H), 5.91 (d,  $J=1.4$  Hz, 2H), 6.00 (d,  $J=2.8$  Hz, 2H), 6.57 (s, 1H), 6.72 ppm (s, 1H);  $^{13}\text{C}$  NMR (100 MHz,  $\text{CDCl}_3$ ):  $\delta=13.6, 21.8, 26.9, 30.0, 33.8, 45.5, 53.2, 56.3, 62.4, 68.7, 101.1, 105.6, 107.2, 120.4, 125.2, 128.8, 146.6, 146.7, 169.0, 172.3, 193.1$  ppm; ESI-MS:  $m/z$  370  $[\text{M}+\text{H}]^+$ ; HRMS:  $m/z$   $[\text{M}+\text{H}]^+$  calcd. for  $\text{C}_{21}\text{H}_{24}\text{NO}_5$ : 370.1654, found: 370.1649.

#### 1-Hexanoyl-2-oxolycorine (37)

Following the previously described general procedure, 200 mg (0.70 mmol) of **23** yielded **37** as a white solid (182 mg, 68.0%).  $^1\text{H}$  NMR (400 MHz,  $\text{CDCl}_3$ ):  $\delta=0.79$  (t,  $J=7.2$  Hz, 3H), 1.11–1.01 (m, 2H), 1.16 (m, 2H), 1.46 (m, 2H), 2.19 (m, 2H), 2.53 (m, 1H), 2.92–2.82 (m, 2H), 3.17 (d,  $J=9.9$  Hz, 1H), 3.27 (d,  $J=10.0$  Hz, 1H), 3.47 (m, 1H), 3.60 (d,  $J=14.1$  Hz, 1H), 4.17 (d,  $J=14.1$  Hz, 1H), 5.92 (s, 2H), 6.00 (dd,  $J=6.4, 2.6$  Hz, 2H), 6.57 (s, 1H), 6.73 ppm (s, 1H);  $^{13}\text{C}$  NMR (100 MHz,  $\text{CDCl}_3$ ):  $\delta=13.8, 22.2, 24.6, 30.0, 30.9, 34.1, 45.5, 53.2, 56.3, 62.4, 68.7, 101.1, 105.6, 107.3, 120.4, 125.2, 128.8, 146.6, 146.7, 169.0, 172.3, 193.1$  ppm; ESI-MS:  $m/z$  384  $[\text{M}+\text{H}]^+$ ; HRMS:  $m/z$   $[\text{M}+\text{H}]^+$  calcd. for  $\text{C}_{22}\text{H}_{26}\text{NO}_5$ : 384.1811, found: 384.1802.

#### 1-Pivaloyl-2-oxolycorine (38)

Following the previously described general procedure, 200 mg (0.70 mmol) of **23** yielded **38** as a white solid (123 mg, 48.0%).  $^1\text{H}$  NMR (400 MHz,  $\text{CDCl}_3$ ):  $\delta=0.99$  (s, 9H), 2.53 (q,  $J=8.6$  Hz, 1H), 2.87 (s, 2H), 3.14 (d,  $J=9.8$  Hz, 1H), 3.28 (d,  $J=9.7$  Hz, 1H), 3.51–3.43 (m, 1H), 3.59 (d,  $J=14.1$  Hz, 1H), 4.18 (d,  $J=14.1$  Hz, 1H), 5.91 (d,  $J=2.6$  Hz, 2H), 5.97 (d,  $J=2.6$  Hz, 1H), 6.00 (s, 1H), 6.57 (s, 1H), 6.69 ppm (s, 1H);  $^{13}\text{C}$  NMR (100 MHz,  $\text{CDCl}_3$ ):  $\delta=26.9, 30.0, 38.9, 45.7, 53.3, 56.4, 62.6, 68.6, 101.1, 105.6, 107.2, 120.4, 125.3, 128.8, 146.5, 168.9, 176.7, 193.1$  ppm; ESI-MS:  $m/z$  370  $[\text{M}+\text{H}]^+$ ; HRMS:  $m/z$   $[\text{M}+\text{H}]^+$  calcd. for  $\text{C}_{21}\text{H}_{24}\text{NO}_5$ : 370.1654, found: 370.1652.

#### 1-(4-Chloro-benzoyl)-2-oxolycorine (40)

Following the previously described general procedure, 200 mg (0.70 mmol) of **23** yielded **40** as a white solid (163 mg, 55.0%).  $^1\text{H}$  NMR (400 MHz,  $\text{CDCl}_3$ ):  $\delta=2.62$  (m, 1H), 2.93 (s, 2H), 3.33 (d,  $J=10.0$  Hz, 1H), 3.42 (d,  $J=9.2$  Hz, 1H), 3.59–3.48 (m, 1H), 3.65 (d,  $J=14.1$  Hz, 1H), 4.22 (d,  $J=14.2$  Hz, 1H), 5.88 (d,  $J=10.8$  Hz, 2H), 6.06 (s, 1H), 6.23 (d,  $J=2.1$  Hz, 1H), 6.56 (s, 1H), 6.80 (s, 1H), 7.33 (d,  $J=8.1$  Hz, 2H), 7.81 ppm (d,  $J=8.1$  Hz, 2H);  $^{13}\text{C}$  NMR (100 MHz,  $\text{CDCl}_3$ ):  $\delta=30.0, 45.5, 53.2, 56.2, 62.5, 69.7, 101.1, 105.3, 107.4, 120.7, 124.9, 127.7, 128.7, 131.3, 131.4, 139.8, 146.6, 164.2, 168.7, 192.4$  ppm; ESI-MS:  $m/z$  424  $[\text{M}+\text{H}]^+$ ; HRMS:  $m/z$   $[\text{M}+\text{H}]^+$  calcd. for  $\text{C}_{23}\text{H}_{19}\text{ClNO}_5$ : 424.0946, found: 424.0941.

#### 1-(4-Methoxyl-benzoyl)-2-oxolycorine (41)

Following the previously described general procedure, 200 mg (0.70 mmol) of **23** yielded **41** as a white solid (156 mg, 53.4%).  $^1\text{H}$  NMR (400 MHz,  $\text{CDCl}_3$ ):  $\delta=2.59$  (q,  $J=8.7$  Hz, 1H), 2.90 (d,  $J=8.9$  Hz, 2H), 3.36 (dd,  $J=20.7, 10.0$  Hz, 2H), 3.55–3.47 (m, 1H), 3.63 (d,  $J=14.1$  Hz, 1H), 3.81 (s, 3H), 4.20 (d,  $J=14.1$  Hz, 1H), 5.87 (d,  $J=12.5$  Hz, 2H), 6.04 (s, 1H), 6.22 (s, 1H), 6.54 (s, 1H), 6.84

(m, 3H), 7.84 ppm (d,  $J=8.3$  Hz, 2H);  $^{13}\text{C}$  NMR (100 MHz,  $\text{CDCl}_3$ ):  $\delta=30.0, 45.7, 53.3, 55.4, 56.3, 62.6, 69.2, 101.1, 105.5, 107.3, 113.5, 120.6, 121.8, 125.2, 128.6, 132.0, 146.7, 163.5, 164.8, 193.0$  ppm; ESI-MS:  $m/z$  420  $[\text{M}+\text{H}]^+$ ; HRMS:  $m/z$   $[\text{M}+\text{Na}]^+$  calcd. for  $\text{C}_{24}\text{H}_{21}\text{NO}_6\text{Na}$ : 442.1261, found: 442.1259.
